# Supplementary material for: Synthesis, characterization and staining performance of peripherally and non-peripherally substituted metallo-phthalocyanines bearing 1,3-bis-(trimethylamino)-2-propoxy groups
Source: Royal Society of Chemistry journal article supplement (doi:10.1039/d0nj01404d), 2020-01-01
Supplement: d0nj01404d1.pdf [file d0nj01404d1.pdf]

## Electronic Supplementary Information

### Synthesis, characterization and staining performance of peripherally and non-peripherally substituted metallo-phthalocyanines bearing 1,3-bis-(trimethylamino)-2-propoxy groups

*Mukaddes Özçeşmeci<sup>a</sup>, Serap Sancar Baş<sup>b</sup>, Barbaros Akkurt<sup>a</sup>, Şehnaz Bolkent<sup>b\*</sup> and Esin Hamuryudan<sup>a\*</sup>*

<sup>a</sup> Istanbul Technical University, Faculty of Science and Letters, Department of Chemistry, 34469 Maslak, Istanbul, Turkey.

<sup>b</sup> Istanbul University, Faculty of Science, Department of Biology, 34134 Vezneciler, Istanbul, Turkey

### Table of Contents

|                                                                                                  |   |
|--------------------------------------------------------------------------------------------------|---|
| NMR spectra of <b>6</b> and <b>10</b> .....                                                      | 2 |
| <b>Fig. S1</b> <sup>1</sup> H NMR spectrum of <b>6</b> in d <sub>6</sub> -DMSO.....              | 2 |
| <b>Fig. S2</b> <sup>13</sup> C NMR spectrum of <b>6</b> in d <sub>6</sub> -DMSO.....             | 2 |
| <b>Fig. S3</b> <sup>1</sup> H NMR spectrum of <b>10</b> in d <sub>6</sub> -DMSO.....             | 3 |
| <b>Fig. S4</b> <sup>13</sup> C NMR spectrum of <b>10</b> in d <sub>6</sub> -DMSO.....            | 3 |
| MALDI-TOF MS spectra of <b>3</b> , <b>5</b> , <b>6</b> , <b>7</b> , <b>9</b> and <b>10</b> ..... | 4 |
| <b>Fig. S5</b> Maldi-TOF MS spectrum of <b>3</b> .....                                           | 4 |
| <b>Fig. S6</b> Maldi-TOF MS spectrum of <b>5</b> .....                                           | 4 |
| <b>Fig. S7</b> Maldi-TOF MS spectrum of <b>6</b> .....                                           | 5 |
| <b>Fig. S8</b> Maldi-TOF MS spectrum of <b>7</b> .....                                           | 5 |
| <b>Fig. S9</b> Maldi-TOF MS spectrum of <b>9</b> .....                                           | 6 |
| <b>Fig. S10</b> Maldi-TOF MS spectrum of <b>10</b> .....                                         | 6 |

## NMR spectra of 6 and 10

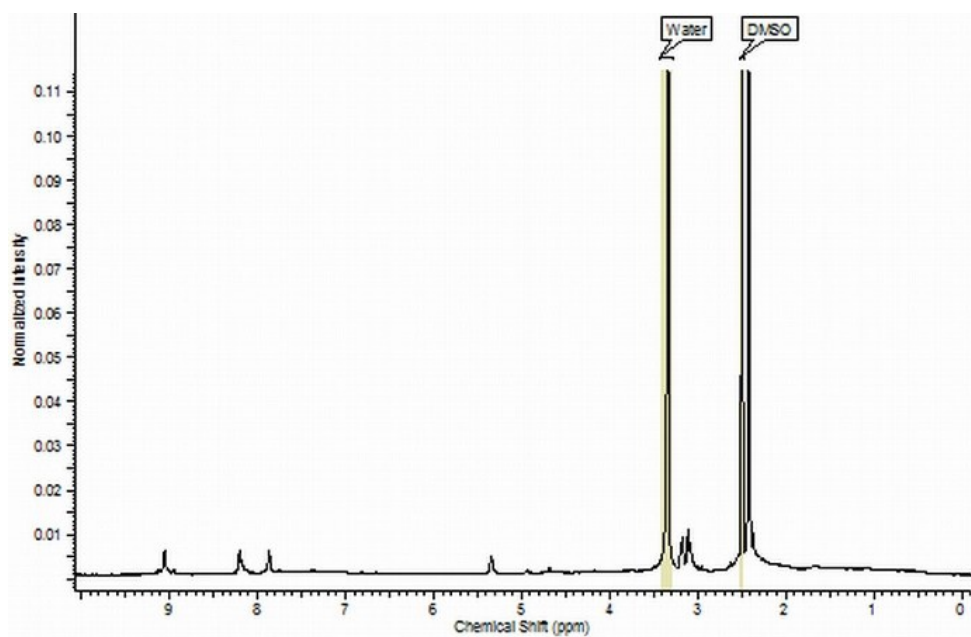

**Fig. S1**  $^1\text{H}$  NMR spectrum of 6 in  $d_6$ -DMSO.

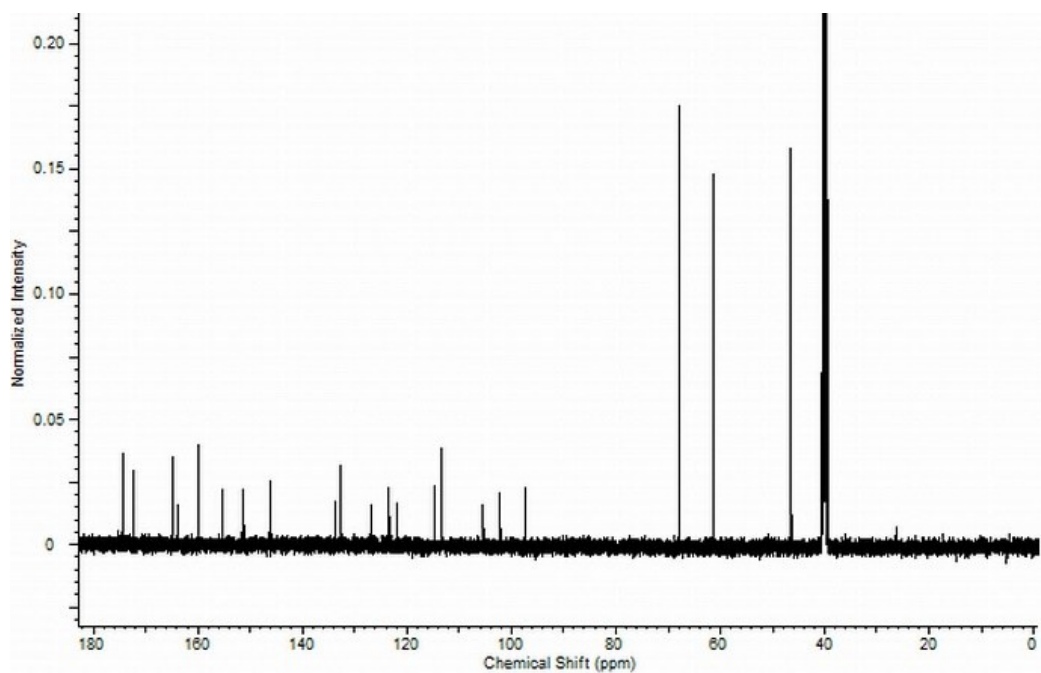

**Fig. S2**  $^{13}\text{C}$  NMR spectrum of 6 in  $d_6$ -DMSO.

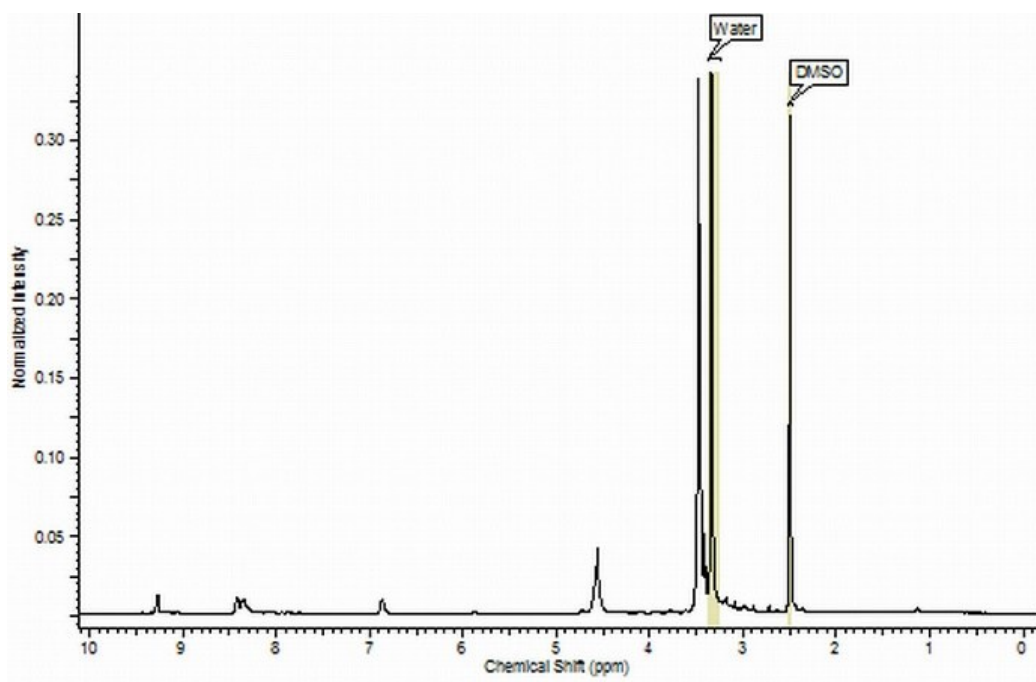

Fig. S3  $^1\text{H}$  NMR spectrum of **10** in  $d_6$ -DMSO.

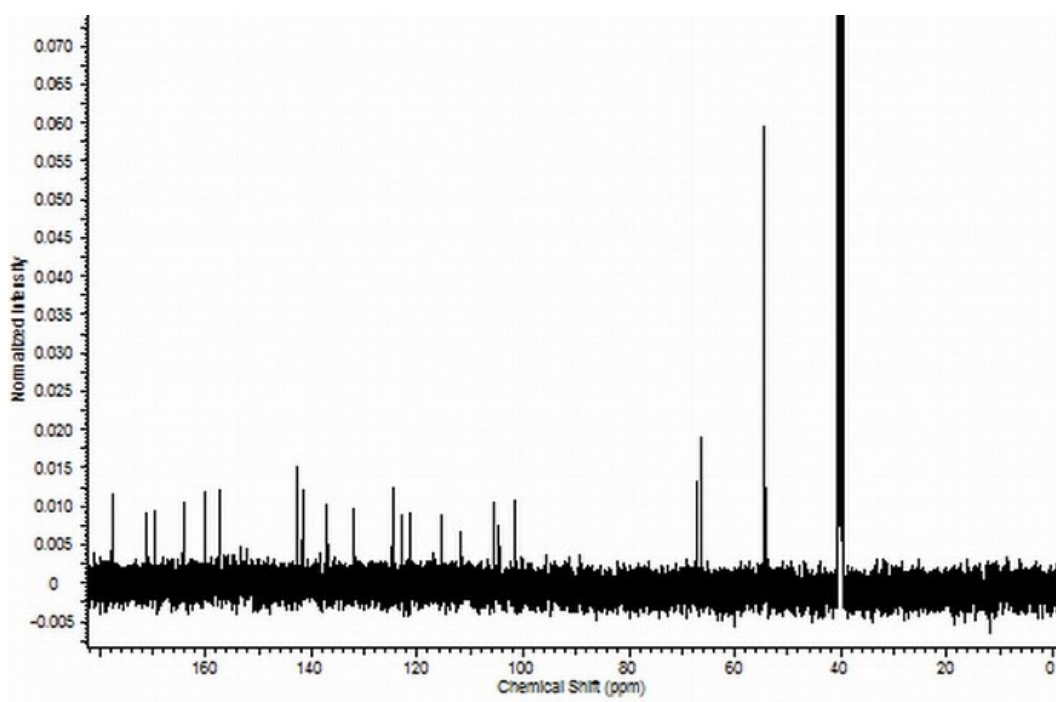

Fig. S4  $^{13}\text{C}$  NMR spectrum of **10** in  $d_6$ -DMSO.

MALDI-TOF MS spectra of 3, 5, 6, 7, 9 and 10

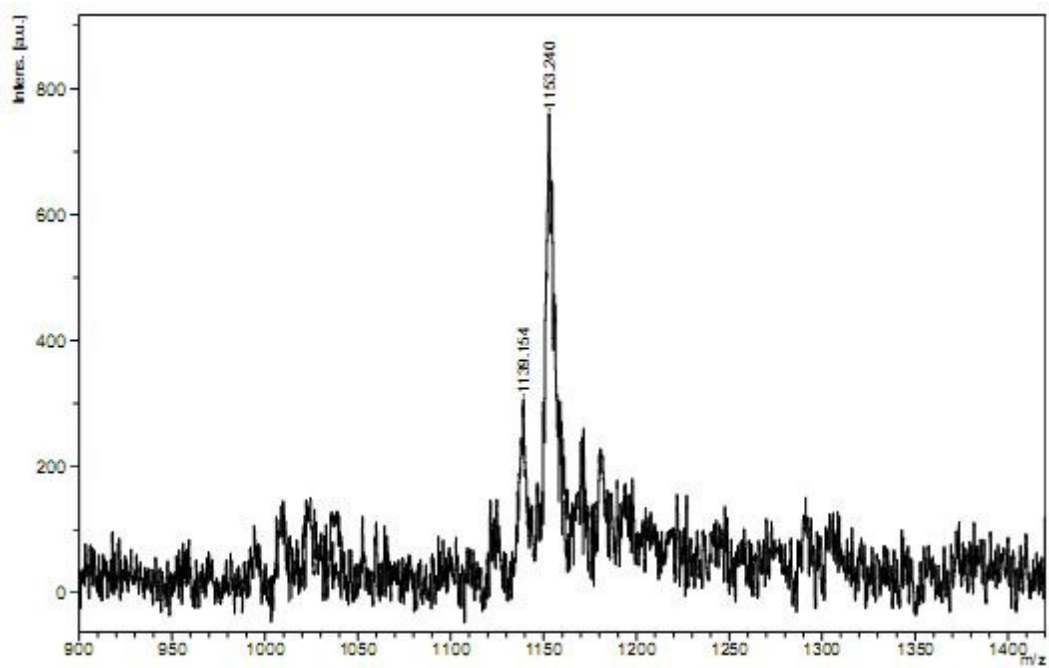

Fig. S5 Maldi-TOF MS spectrum of 3.

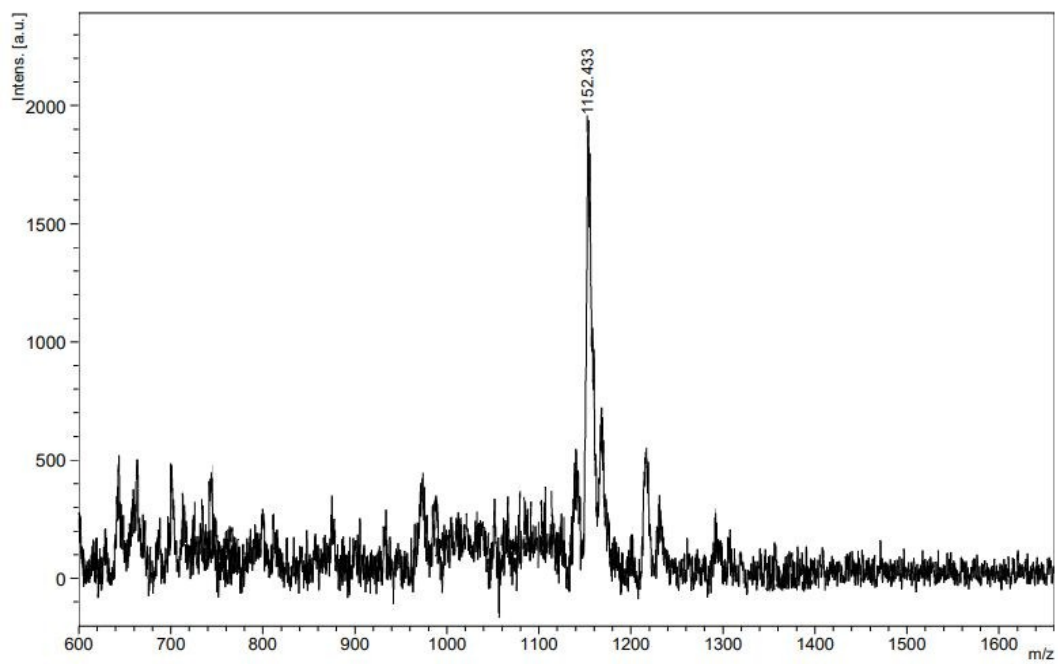

Fig. S6 Maldi-TOF MS spectrum of 5.

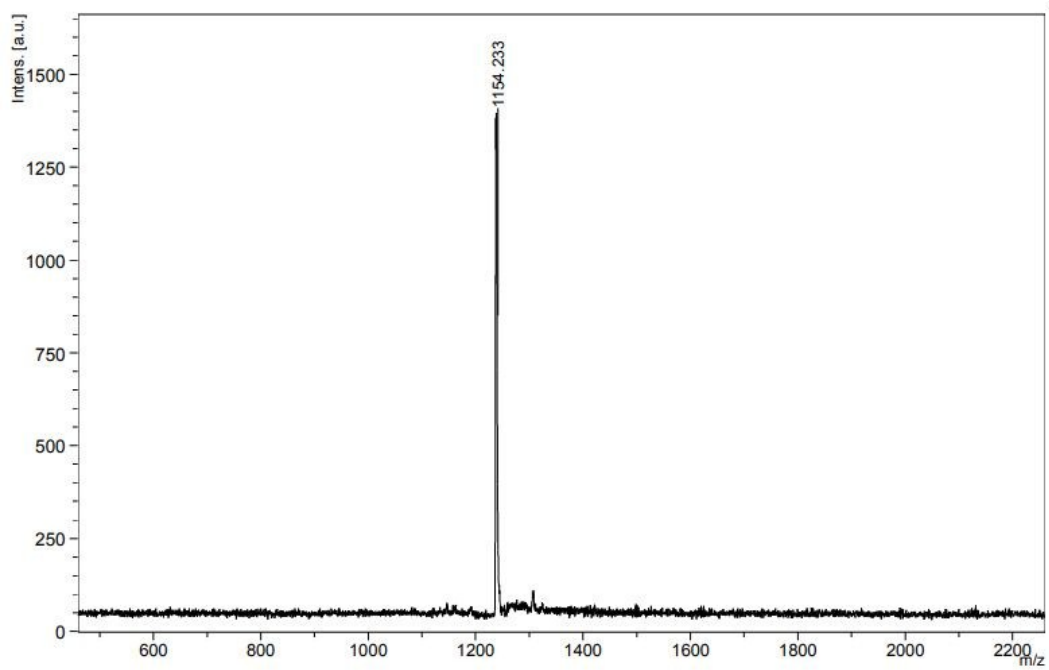

**Fig. S7** Maldi-TOF MS spectrum of 6.

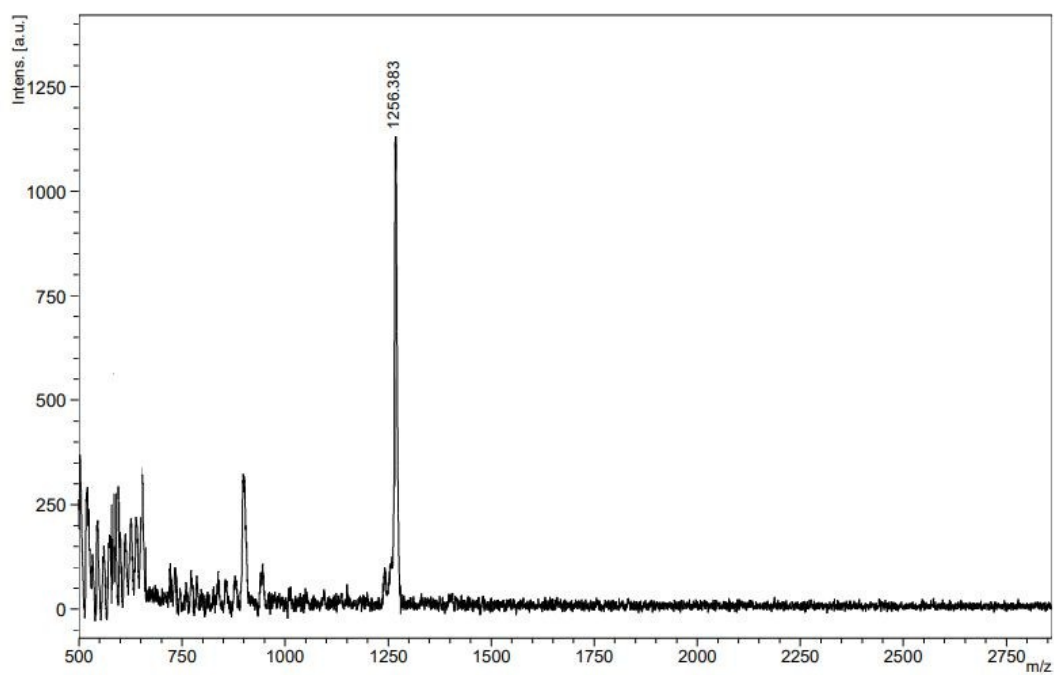

**Fig. S8** Maldi-TOF MS spectrum of 7.

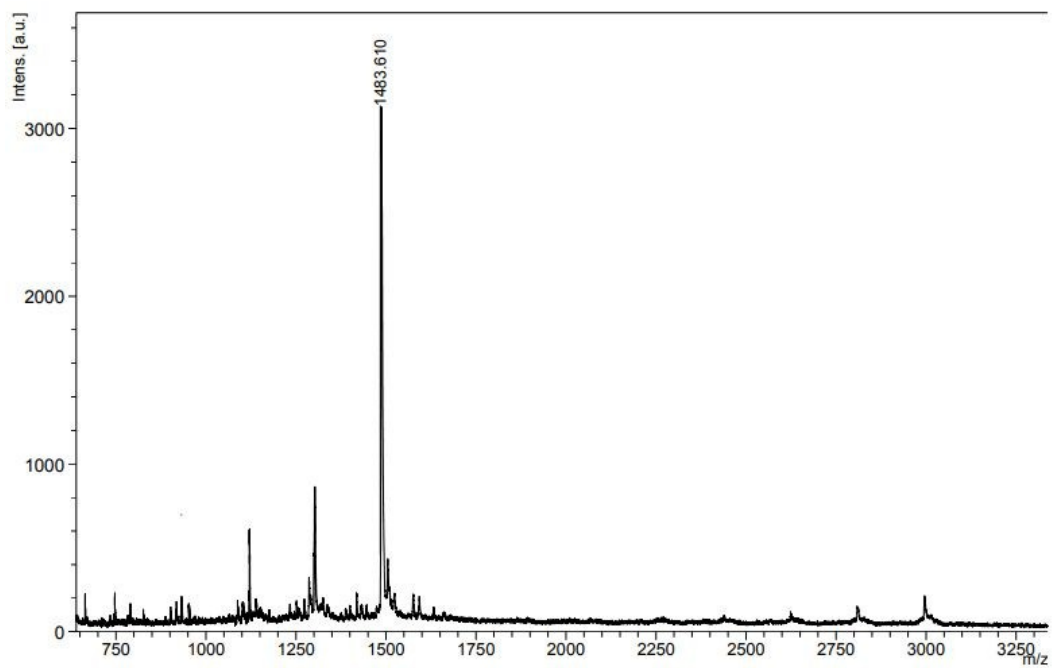

**Fig. S9** Maldi-TOF MS spectrum of **9**.

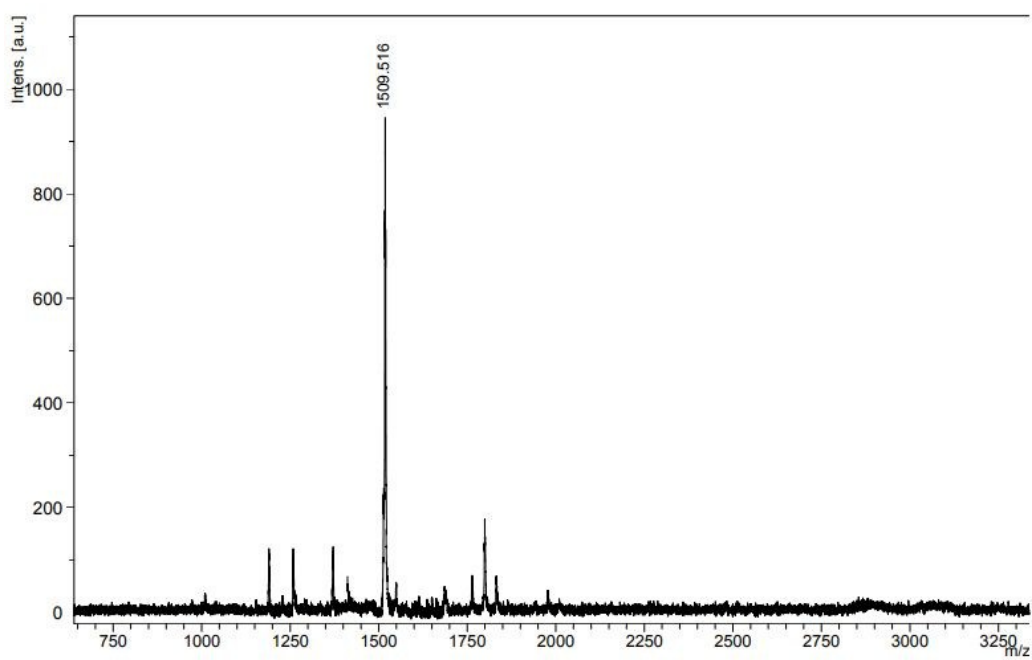

**Fig. S10** Maldi-TOF MS spectrum of **10**.
